# Supplementary material for: Harnessing dairy wastewater to cultivate Scenedesmus sp. for biofertilizer applications in Phaseolus vulgaris L.: a sustainable agro-biotechnological approach
Source: Front Plant Sci. 2025 May 1;16:1568057. doi: 10.3389/fpls.2025.1568057 (PMC12105497; doi:10.3389/fpls.2025.1568057)
Supplement: Supplementary file 1 [file Table1.xlsx]

## Sheet: Cell density
				BG11				DIWW 80% + SEAWATER 20%
			DAY	PBR1	PBR2	PBR3	PBR4	PBR1	PBR2	PBR3	PBR4
			0	15000000	15000000	15000000	15000000	15000000	15000000	15000000	15000000		15000000	15000000
			1	10600000	21850000	17550000	16700000	26700000	22000000	28925000	26066600		16675000	25922900		4.6351e+06	2.88827e+06
			2	20825000	25700000	27875000	24900000	25125000	27925000	23425000	25199999		24825000	2.54187e+07		2.94809e+06	1.86105e+06
			3	19350000	23500000	24800000	22400000	21500000	23775000	22250000	22400000		22512500	22481250		2.32536e+06	948107
			4	18350000	23600000	21450000	21000000	16850000	22550000	22100000	20800000		21100000	20575000		2.156e+06	2.59181e+06
			5	31250000	31110000	31250000	31200000	22520000	23500000	19190000	22000000		31202500	21802500		66017.7	1.84937e+06
			6	20700000	26450000	24050000	23600000	25250000	34550000	26000000	28500000		23700000	28575000		2.35903e+06	4.21871e+06
			7	42375000	26500000	41575000	36900000	29300000	36175000	37275000	34500000		36837500	34312500		7.30241e+06	3.53108e+06
			8	32600000	42850000	28550000	34700000	32200000	38550000	36600000	35900000		34675000	35812500		6.0181e+06	2.65656e+06
			9	38650000	29000000	30200000	32520000	39250000	37750000	42700000	40000000		32592500	39925000		4.29452e+06	2.07304e+06
			10	46700000	43750000	39900000	43621000	44350000	46000000	43200000	44440000		43492750	44497500		2.78549e+06	1.14979e+06
			11	41000000	50650000	38150000	43199999	33900000	42300000	42700000	38900000		4.325e+07	39450000		5.34899e+06	4.0739e+06
				-0.500898	0.542671	0.226509	0.154886	0.831877	0.552541	0.947354	0.79724
				0.974252	0.234135	0.667501	0.576298	-0.0877161	0.344054	-0.304268	-0.0487787			1000	0.0005	0.5

## Sheet: Dry weight
			BG11				DIWW 80%
		DAY	PBR1	PBR2	PBR3	PBR4	PBR1	PBR2	PBR3	PBR4
		0	0.78	0.85	0.8	0.79	0.99	0.75	1	0.89
		1	0.82	0.9	0.84	0.83	1.2	0.8	1.1	1
		2	1.4	1.04	0.8	1.09	1.96	1.8	1.84	1.86
		3	1.2	1.32	1.24	1.23	2.12	2.16	2.06	2.1
		4	2.08	2.28	1.36	1.92	2.86	2.54	2.82	2.75
		5	2.52	2.04	1.66	2.01	2.84	2.62	2.56	2.66
		6	2.6	2.78	2.08	2.5	2.68	2.5	2	2.38
		7	2.92	2.7	2.4	2.65	2.7	2.6	2.48	2.58
		8	2.48	2.88	2.48	2.59	2.38	2.86	2.52	2.6
		9	2.5	2.14	2	2.22	2.7	2.4	2.38	2.48
		10	2.94	2.8	2.64	2.78	2.48	3.34	2.84	2.9
		11	3.54	2.78	2.96	3	2.82	3.92	3.3	3.34
log2 =	0.693147	días 4-3	0.916559	0.913057	0.458886	0.811824	0.665918	0.528569	0.680544	0.636176
					0.775082	0.21632			0.627802	0.0686827
		días 11-10	0.55223	0.359344	0.480923	0.442674	0.494991	0.526634	0.516631	0.507773
					0.458793	0.0803535			0.511507	0.0134386

## Sheet: Nutrient removal
																		100
		mM																				%
		BG11(TN)				DIWW 80%(TN)				BG11(PO43-)				DIWW 80%(PO43-)								BG11(N)				DIWW 80%(N)				BG11(PO43-)				DIWW 80%(PO43-)
	DAY	PBR1	PBR2	PBR3	PBR4	PBR1	PBR2	PBR3	PBR4	PBR1	PBR2	PBR3	PBR4	PBR1	PBR2	PBR3	PBR4				DAY	PBR1	PBR2	PBR3	PBR4	PBR1	PBR2	PBR3	PBR4	PBR1	PBR2	PBR3	PBR4	PBR1	PBR2	PBR3	PBR4
	0	17.62	17.65	17.67	17.61	18.3	18.27	18.27	18.24	0.23	0.26	0.25	0.27	1.61	1.58	1.6	1.59				0	0	0	0	0	0	0	0	0	0	0	0	0	0	0	0	0
	1	15.44	15.25	15.01	15.33	17.44	17.55	17.66	17.33	0.2	0.22	0.21	0.23	1.59	1.55	1.54	1.5				1	12.3723	13.5977	15.0538	12.9472	4.69945	3.94089	3.33881	4.98904	13.0435	15.3846	16	14.8148	1.24224	1.89873	3.75	5.66038
	2	12.55	12.01	12.67	12.87	17.01	16.99	17.33	16.87	0.17	0.19	0.18	0.19	1.49	1.4	1.5	1.39				2	28.7741	31.9547	28.2965	26.9165	7.04918	7.00602	5.14505	7.51096	26.087	26.9231	28	29.6296	7.45342	11.3924	6.25	12.5786
	3	11.44	11.51	11.99	11.55	15.21	15.51	15.02	14.87	0.15	0.17	0.17	0.18	1.33	1.21	1.45	1.3				3	35.0738	34.7875	32.1449	34.4123	16.8852	15.1067	17.7887	18.4759	34.7826	34.6154	32	33.3333	17.3913	23.4177	9.375	18.239
	4	10.01	10.09	10.09	10	13.35	13.44	13.99	13.05	0.14	0.12	0.15	0.16	1.21	1.1	1.23	1.09				4	43.1896	42.8329	42.8976	43.2141	27.0492	26.4368	23.4264	28.4539	39.1304	53.8462	40	40.7407	24.8447	30.3797	23.125	31.4465
	5	8.66	7.77	7.99	8.01	11.72	12.01	12.44	11.09	0.11	0.11	0.13	0.14	1.01	0.98	1.06	0.95				5	50.8513	55.9773	54.7821	54.5145	35.9563	34.2638	31.9102	39.1996	52.1739	57.6923	48	48.1481	37.2671	37.9747	33.75	40.2516
	6	7.87	7.77	7.55	7.78	9.87	11.07	11.39	10.61	0.1	0.09	0.09	0.11	0.88	0.79	0.99	0.81				6	55.3348	55.9773	57.2722	55.8206	46.0656	39.4089	37.6574	41.8311	56.5217	65.3846	64	59.2593	45.3416	50	38.125	49.0566
	7	6.33	6.21	6.28	5.87	7.44	10.05	10.33	9.42	0.09	0.07	0.08	0.1	0.71	0.7	0.87	0.75				7	64.0749	64.8159	64.4595	66.6667	59.3443	44.9918	43.4592	48.3553	60.8696	73.0769	68	62.963	55.9006	55.6962	45.625	52.8302
	8	6.01	5.87	5.73	5.55	5.71	7.44	8.47	7.91	0.073	0.069	0.069	0.089	0.67	0.61	0.77	0.65				8	65.891	66.7422	67.5722	68.4838	68.7978	59.2775	53.6398	56.6338	68.2609	73.4615	72.4	67.037	58.3851	61.3924	51.875	59.1195
	9	4.42	4.33	4.81	4	4.22	6.33	6.19	6.01	0.069	0.06	0.065	0.075	0.58	0.55	0.65	0.49				9	74.9149	75.4674	72.7787	77.2856	76.9399	65.353	66.1193	67.0504	70	76.9231	74	72.2222	63.9752	65.1899	59.375	69.1824
	10	3.33	3.65	3.56	3.44	3.01	5.44	5.33	5.21	0.06	0.055	0.06	0.059	0.33	0.37	0.43	0.41				10	81.101	79.3201	79.8529	80.4656	83.5519	70.2244	70.8265	71.4364	73.913	78.8462	76	78.1481	79.5031	76.5823	73.125	74.2138
	11	2.14	1.54	1.43	1.07	2.98	3.79	5.12	3.33	0.057	0.049	0.055	0.048	0.366	0.347	0.34	0.386				11	87.8547	91.2748	91.9072	93.9239	83.7158	79.2556	71.9759	81.7434	75.2174	81.1538	78	82.2222	77.2671	78.038	78.75	75.7233

## Sheet: CHO
	BG11
	PBR1			PBR2			PBR3			PBR4
	R1	R2	R3	R1	R2	R3	R1	R2	R3	R1	R2	R3
	344.89	404.02	319.89	395.11	360.11	386.41	323.37	358.15	386.41	404.1	319.91	368.22
	DIWW 80%
	PBR1			PBR2			PBR3			PBR4
	R1	R2	R3	R1	R2	R3	R1	R2	R3	R1	R2	R3
	355.98	394.02	359.24	390.76	455.98	369.02	345.11	312.5	326.63	399.44	348.32	358.77

## Sheet: Protein
		BG11
		PBR1			PBR2			PBR3			PBR4
		R1	R2	R3	R1	R2	R3	R1	R2	R3	R1	R2	R3
		285.658	477.453	303.607	357.282	397.709	284.803	426.085	354.291	413.607	377.09	365.44	350.02
		DIWW 80%
		PBR1			PBR2			PBR3			PBR4
		R1	R2	R3	R1	R2	R3	R1	R2	R3	R1	R2	R3
		407.111	341.043	326.085	436.769	379.248	403.35	385.658	403.009	381.385	388.56	380.33	380.01

## Sheet: Lipid
	BG11
	PBR1			PBR2			PBR3			PBR4
	R1	R2	R3	R1	R2	R3	R1	R2	R3	R1	R2	R3
	197.6	201.75	200.477	226.033	212.92	195.87	130.253	128.8	127.17	175.44	181.23	185.34
	DIWW 80%
	PBR1			PBR2			PBR3			PBR4
	R1	R2	R3	R1	R2	R3	R1	R2	R3	R1	R2	R3
	198.28	201.367	204.253	158.9	145.937	144.01	194.577	196.333	191.27	182.12	180.44	181.65

## Sheet: Soil
			SI				C- P1			C- P2			C- P3					C+ P1			C+ P2			C+ P3					T1 P1			T1 P2			T1 P3					T2 P1			T2 P2			T2 P3
		FCU g-1					FCU g-1											FCU g-1											FCU g-1											FCU g-1
		R1	R2	R3			R1	R2	R3	R1	R2	R3	R1	R2	R3			R1	R2	R3	R1	R2	R3	R1	R2	R3			R1	R2	R3	R1	R2	R3	R1	R2	R3			R1	R2	R3	R1	R2	R3	R1	R2	R3
		86000000	84000000	89000000			93000000	90000000	89000000	95000000	87000000	81000000	99500000	86500000	84300000			52000000	55500000	48700000	51300000	54100000	57000000	46700000	49300000	52100000			1200000000	1150000000	1290000000	1310000000	1240000000	1350000000	1330000000	1290000000	1310000000			1120000000	1240000000	1100000000	1160000000	1200000000	1210000000	1130000000	1150000000	1210000000
										9.06667e+07	8.76667e+07	90100000									5.20667e+07	5.41333e+07	4.93667e+07									1.21333e+09	1300000000	1310000000									1.15333e+09	1190000000	1.16333e+09
		NO3- mg g-1					C- P1			C- P2			C- P3					C+ P1			C+ P2			C+ P3					T1 P1			T1 P2			T1 P3					T2 P1			T2 P2			T2 P3
		R1	R2	R3			NO3- mg g-1											NO3- mg g-1											NO3- mg g-1											NO3- mg g-1
		82.23	83.07	81.44			R1	R2	R3	R1	R2	R3	R1	R2	R3			R1	R2	R3	R1	R2	R3	R1	R2	R3			R1	R2	R3	R1	R2	R3	R1	R2	R3			R1	R2	R3	R1	R2	R3	R1	R2	R3
							86.75	88.44	90.01	85.44	83.22	92.31	87.08	82.33	89.45			72.95	77.01	70.23	76.44	79.23	71.24	70.87	69.33	73.07			101.54	112.33	107.44	111.45	109.25	100.76	108.76	107.77	104.3			95.66	94.79	95.66	94.88	93.89	93.44	94.33	95.33	94.89
										88.4	87.5367	86.2867									73.3967	75.6367	71.09									107.103	107.153	106.943									95.37	94.07	94.85
		PO4-3 mg g-1					C- P1			C- P2			C- P3					C+ P1			C+ P2			C+ P3					T1 P1			T1 P2			T1 P3					T2 P1			T2 P2			T2 P3
		R1	R2	R3			PO43- mg g-1											PO43- mg g-1											PO43- mg g-1											PO43- mg g-1
		32.44	33.23	31.45			R1	R2	R3	R1	R2	R3	R1	R2	R3			R1	R2	R3	R1	R2	R3	R1	R2	R3			R1	R2	R3	R1	R2	R3	R1	R2	R3			R1	R2	R3	R1	R2	R3	R1	R2	R3
							41.04	44.33	38.77	40.99	37.86	42.67	39.56	40.01	38.33			44.89	40.33	45.41	40.06	42.34	41.89	45.45	47.01	46.33			71.46	73.32	70.87	74.33	72.45	71.09	70.33	71.04	70.67			78.16	79.44	80.05	75.44	73.32	71.56	72.33	73.23	74.9
										41.38	40.5067	39.3									43.5433	41.43	46.2633									71.8833	72.6233	70.68									79.2167	73.44	73.4867
		MO %					C- P1			C- P2			C- P3					C+ P1			C+ P2			C+ P3					T1 P1			T1 P2			T1 P3					T2 P1			T2 P2			T2 P3
		R1	R2	R3			MO %											MO %											MO %											MO %
		2.37	2.39	2.22			R1	R2	R3	R1	R2	R3	R1	R2	R3			R1	R2	R3	R1	R2	R3	R1	R2	R3			R1	R2	R3	R1	R2	R3	R1	R2	R3			R1	R2	R3	R1	R2	R3	R1	R2	R3
							2.23	2.1	2.15	2.33	2.28	2.3	2.15	2.21	2.17			2.34	2.25	2.19	2.44	2.32	2.4	2.28	2.39	2.33			3.47	3.55	3.61	3.28	3.31	3.4	3.61	3.55	3.49			3.21	3.32	3.18	3.42	3.18	3.2	3.19	3.14	3.22
										2.16	2.30333	2.17667									2.26	2.38667	2.33333									3.54333	3.33	3.55									3.23667	3.26667	3.18333
		pH					C- P1			C- P2			C- P3					C+ P1			C+ P2			C+ P3					T1 P1			T1 P2			T1 P3					T2 P1			T2 P2			T2 P3
		R1	R2	R3			pH											pH											pH											pH
		6.1	6.35	6			R1	R2	R3	R1	R2	R3	R1	R2	R3			R1	R2	R3	R1	R2	R3	R1	R2	R3			R1	R2	R3	R1	R2	R3	R1	R2	R3			R1	R2	R3	R1	R2	R3	R1	R2	R3
							6.1	6.05	5.91	6.01	6.21	6.04	6.2	6	5.89			6.3	6.32	6.41	6.11	6.25	6.38	6.19	6.44	6.22			6.5	6.47	6.59	6.39	6.41	6.32	6.7	6.6	6.53			6.51	6.48	6.55	6.49	6.35	6.4	6.65	6.6	6.55
										6.02	6.08667	6.03									6.34333	6.24667	6.28333									6.52	6.37333	6.61									6.51333	6.41333	6.6

## Sheet: Germination index
		C- (distilled water)						C+ (foliar fertilizer)						T1 (microalgae extracts)						T2 (microalgae culture)
		Number of germinated seeds						Number of germinated seeds						Number of germinated seeds						Number of germinated seeds
		Petri dish1	Petri dish2	Petri dish3	Petri dish4			Petri dish1	Petri dish2	Petri dish3	Petri dish4			Petri dish1	Petri dish2	Petri dish3	Petri dish4			Petri dish1	Petri dish2	Petri dish3	Petri dish4
		15	14	15	19			14	13	16	16			18	19	22	20			13	17	18	15
		 =	15.75					 =	14.75					 =	19.75					 =	15.75
		SD =	2.21736					SD =	1.5					SD =	1.70783					SD =	2.21736
		C- (distilled water)						C+ (foliar fertilizer)						T1 (microalgae extracts)						T2 (microalgae culture)
		Length of germinated seeds (cm)						Length of germinated seeds (cm)						Length of germinated seeds (cm)						Length of germinated seeds (cm)
		Petri dish1	Petri dish2	Petri dish3	Petri dish4			Petri dish1	Petri dish2	Petri dish3	Petri dish4			Petri dish1	Petri dish2	Petri dish3	Petri dish4			Petri dish1	Petri dish2	Petri dish3	Petri dish4
	1	2.91	2.87	2.95	2.56		1	3.87	3.77	3.55	3.26		1	6.01	6.07	6	6		1	5.33	5	5.22	5.15
	2	2.27	2.41	2.09	2.97		2	3.76	3	3.22	3.33		2	5.99	6.32	5.99	5.42		2	4.97	5.04	5.47	5.34
	3	2.77	2.98	2.33	2.44		3	3.97	3.85	3.04	3		3	6.05	6.04	6.11	5.28		3	5	5.68	5.35	5.3
	4	2.44	2.55	2.67	2.47		4	3.38	3.29	3.02	3.67		4	6.22	6	6.03	5.44		4	5.66	5.19	5.47	5.26
	5	2.05	2.45	2.91	2.44		5	3.87	3.91	3.28	3.27		5	6.13	5.55	6.05	5.67		5	5.06	5.11	5.22	5.32
	6	2.65	2.44	2.18	2.55		6	3.55	3.21	3.08	3.51		6	6.18	5.67	6.02	6.25		6	5.32	5.45	5.75	5.2
	7	3.09	2.33	2.22	2.73		7	3.07	3.27	3.22	3.31		7	5.77	6	6.05	6		7	5.19	5.36	5.27	5
	8	3.22	2.53	2.22	2.67		8	3.06	3.99	3.07	3.25		8	6.33	6.2	5.55	5.43		8	5.67	5.32	5.84	5.99
	9	2.4	2.39	2.28	2.37		9	3.21	3.89	3.38	3		9	6	6.01	6.23	5.67		9	5.09	5.16	5.41	5.32
	10	2.38	2.22	2.78	2.44		10	3	3.06	3.85	3.04		10	6.24	6.06	6.08	5.44		10	5.36	5.81	5.61	5.56
	11	2.35	2.91	2.38	2.34		11	3.22	3.17	3.27	3.16		11	5.69	5.66	6	6.17		11	5.44	5.29	5	5.14
	12	2.38	2.19	2.39	2.77		12	3.44	3.87	3.45	3.03		12	6.16	6.15	5.33	6.05		12	5.33	5.18	5.59	5.64
	13	2.44	2.36	2.09	2.67		13	3	3.09	3.06	3.48		13	6.3	6.07	6.31	6		13	5.17	5.75	5.48	5.51
	14	2.07	2.71	2.19	2.28		14	3.35		3.21	3.44		14	5.78	6.12	6.4	5.87		14		5.12	5.32	4.89
	15	2.22		2.04	2.55		15			3	3.61		15	6.02	6.23	5.33	6.25		15		5.69	5	5.74
	16				2.77		16			3.86	3.33		16	6.11	6	5.29	6.04		16		5.49	4.91
	17				2.35		17						17	6.1	5.89	6	5.41		17		5.68	5.33
	18				2.99		18						18	6	6.44	6.4	6.08		18			5.1
	19				2.07		19						19		6.05	6.09	6.39		19
	20						20						20			6.1	6		20
	21						21						21			6			21
	22						22						22			6.11			22
	23						23						23						23
	24						24						24						24
	25						25						25						25
	 =	2.50933	2.52429	2.38133	2.54895		 =	3.41071	3.49	3.285	3.29312		 =	6.06	6.02789	5.97591	5.843		 =	5.27615	5.37176	5.35222	5.35733
			 =	2.49413					 =	3.3622					 =	5.97392					 =	5.34302
			SD =	0.285909					SD =	0.309087					SD =	0.283429					SD =	0.257992
											100
															SD
							C+	GI (%) =	126.86	128.381	147.144	108.796		127.795	15.6692
							T1	GI (%) =	289.798	324.08	368.057	241.297		305.808	53.6248
							T2	GI (%) =	182.226	258.404	269.709	165.93		219.067	52.5761

## Sheet: Percentage Germination
	C- (distilled water)				C+ (foliar fertilizer)				T1 (microalgae extracts)				T2 (microalgae culture)
	Number of germinated seeds				Number of germinated seeds				Number of germinated seeds				Number of germinated seeds
	Plot1	Plot2	Plot3		Plot1	Plot2	Plot3		Plot1	Plot2	Plot3		Plot1	Plot2	Plot3
	22	23	20		23	23	25		28	27	29		23	24	23
	 =	21.6667			 =	23.6667			 =	28			 =	23.3333
	SD =	1.52753			SD =	1.1547			SD =	1			SD =	0.57735
n =	30
	C- (distilled water)				C+ (foliar fertilizer)				T1 (microalgae extracts)				T2 (microalgae culture)
	% germination				% germination				% germination				% germination
	Plot1	Plot2	Plot3		Plot1	Plot2	Plot3		Plot1	Plot2	Plot3		Plot1	Plot2	Plot3
	73.3333	76.6667	66.6667		76.6667	76.6667	83.3333		93.3333	90	96.6667		76.6667	80	76.6667
	 =	72.2222			 =	78.8889			 =	93.3333			 =	77.7778
	SD =	5.09175			SD =	3.849			SD =	3.33333			SD =	1.9245

## Sheet: Plant height
		C- (distilled water)												C+ (foliar fertilizer)												T1 (microalgae extracts)												T2 (microalgae culture)
		Plant height (cm)												Plant height (cm)												Plant height (cm)												Plant height (cm)
		WEEK 1												WEEK 1												WEEK 1												WEEK 1
		Plot1			Plot2			Plot3						Plot1			Plot2			Plot3						Plot1			Plot2			Plot3						Plot1			Plot2			Plot3
	1	2.18	2.33	2.18	2.11	2	2.19	2.22	2.13	2.01			1	2.99	3.01	3.33	3.15	3.33	2.89	3.21	3	3.14			1	4.31	4.98	4.77	4.9	5.02	4.86	5.15	3.09	4.91			1	4.05	4.1	4.22	4	3.9	4.11	4.23	4.15	3.88
	2	2.14	2.21	2	1.9	2.21	1.79	1.95	2.06	2			2	3.13	3.21	3	3.09	3.14	3.11	3.04	3.33	2.95			2	4.99	5.11	5.22	5.13	5.02	5.14	4.94	5.11	5.04			2	4.27	3.99	4.06	4.3	4.19	4.05	4.27	4.11	3.83
	3	2	2.21	2.03	1.88	2.01	2.07	2.09	2.44	2.17			3	3.04	3.2	3.15	3.17	2.86	3.27	3	3.04	3.15			3	5.14	5.05	5	5.21	5.32	5	5.25	5.07	5.33			3	4	3.77	4.32	4.16	3.87	4.15	4.16	4.05	4
	4	2.21	2.09	2.07	2.11	2	1.8	1.87	2.31	2.2			4	3.33	3.19	3.02	3.4	3.01	3.1	3.21	1.09	3.03			4	5.5	5.14	4.88	5.11	5.05	5.23	5.19	5.24	4.95			4	4.15	4.16	4.09	4	4.24	4.17	3.77	4.01	4.22
	5	2.31	2.2	2.11	2.3	2.18	2.06	2.21	2.1	2.17			5	1.68	3.26	3.37	2.94	3.26	3.28	3.11	2.92	3.16			5	5.3	5.22	5.07	5.37	5.18	5.06	4.79	5.3	5.16			5	4.25	4.1	4.05	3.55	4.44	4	4.05	3.85	4.31
	6	2.14	2.01	2	2.07	1.83	2	1.77	2.4	2.11			6	3.08	2.81	3	3.15	2.93	3.04	3	3.12	3.25			6	5.23	5.12	5.16	5.01	5.1	5.19	5.13	5	5.2			6	4.33	4.02	3.67	4.11	4.37	3.99	4.23	4.16	4.24
	7	2.24	2.19	2.06	2.24	2.3	2.07	1.9	2.22				7	2.75	3.16	3.05	3.03	3.1	2.89	3.21	2.76	3.04			7	5.05	5.16	5.44	5	5.28	5.11	5.08	5.24	5.15			7	3.84	4.26	4.13	4.05	4.35	4.25	3.99	4.44	4.26
	8	2.2			1.84	2.4							8	2.22	3.18		3.9	3.44		3.33	3.14	3			8	5.18	5.08	5.26	5.24	3.33	5.19	5.05	5.16	5.32			8	4	4.37		4.33	4.08	3.55	4.17	4
	9												9							2.91					9	5.17	4.95	5.22	5.01	5.34	5.27	5.32	5.14	5.1			9
	10												10												10	5.12						5.06	5.2				10
		 =	2.14136		 =	2.05913		 =	2.1165					 =	3.00696		 =	3.1513		 =	3.0056					 =	5.10071		 =	5.06185		 =	5.05759					 =	4.09565		 =	4.09208			4.10348
		SD =	0.0988166		SD =	0.169944		SD =	0.170148					SD =	0.375335		SD =	0.228976		SD =	0.421011					SD =	0.21693		SD =	0.369948		SD =	0.400068					SD =	0.17565		SD =	0.223529		SD =	0.169802
					 =	2.10462											 =	3.05324											 =	5.07333											 =	4.097
					SD =	0.151586											SD =	0.355245											SD =	0.335496											SD =	0.188966
		C- (distilled water)												C+ (foliar fertilizer)												T1 (microalgae extracts)												T2 (microalgae culture)
		Plant height (cm)												Plant height (cm)												Plant height (cm)												Plant height (cm)
		WEEK 5												WEEK 5												WEEK 5												WEEK 5
		Plot1			Plot2			Plot3						Plot1			Plot2			Plot3						Plot1			Plot2			Plot3						Plot1			Plot2			Plot3
	1	30.44	31.21	29.87	33.03	32.02	31.05	28.87	29.05	33.45			1	34.56	37.42	36.45	35.15	35.67	36	32.67	31.21	34.55			1	47.8	46	51	45.55	49.01	47.34	48.34	47.91	51			1	41.24	40.09	43	41.28	42.33	43.81	41.78	42.14	41.56
	2	32.05	29.87	30	31.02	33.04	30.87	30.65	31.21	32			2	31.04	34.63	31.52	30.78	33.89	31.56	36	31.01	34.98			2	50.28	49.54	49	48.93	51.82	50.38	51.22	47.85	49.28			2	40.02	41.23	43.45	47	44.79	42.45	41.77	40.99	43.78
	3	27.84	32.08	33	32.08	29.05	33.02	28.77	31	30.46			3	32.28	33.95	37	34.95	30.39	32.31	34.69	31.98	33.54			3	48.86	51.41	49.33	49.09	48.94	49.06	49.61	48.55	50.77			3	44.5	43.04	42	41	44.09	40	43.67	41.59	42.52
	4	30.55	31.09	29.71	28.67	30.01	31	30.06	33	27.91			4	34.55	34.01	32.04	36.9	32.4	34.35	32.9	33.57	30.48			4	49.32	49.07	48.94	51.02	49.85	49.18	51.25	50.33	49.84			4	41.06	40.04	43.39	42.77	44.03	40.06	45	41.23	42.65
	5	31.22	30.67	32.07	30.77	31.42	28.81	30.44	29	31.2			5	33.99	33.39	32.37	31.21	32.46	33.1	33.86	35.02	32.4			5	51.22	49.81	50.33	48.79	50.11	49.15	50.36	51	49.49			5	43.28	43.65	41.21	43.16	44	42.64	43.28	44.06	40.97
	6	30.32	32.08	31.07	29.63	29	31.51	33.01	32.03	30.66			6	35.66	32.49	33.66	34.56	31.24	34.16	30.82	33.13	31.14			6	50.05	49.58	48.78	49.36	51.2	49.33	49.31	50.19	49.13			6	42.71	41.36	43	40.86	42.85	42.33	41.24	43.45	42.8
	7	32.67	30.21	28.09	31	30.11	32.09	32.05	31				7	32.99	31.49	36.77	33.67	35.66	32.07	34.81	32.72	31.43			7	51.23	49.04	48.49	49.31	48.86	50	49.07	50.53	49.4			7	44.01	41.23	42.19	42.09	41.67	40.99	41.78	42.09	41.33
	8												8				31.76	32.69		32.66	34.04	34.55			8	48.91	49.91	51.23	50.08	51.2	49.65	48.33	49.05	51.26			8	43.01			42.18	44.39		43.55	43.67
	9												9												9	48.03	49.33	47.42	49.19	49.06	48.9	49.71	48.3	49.12			9
	10												10												10							50.44	51				10
		 =	30.7671		 =	30.9143		 =	30.791					 =	33.9171		 =	33.3448		 =	33.09					 =	49.4041		 =	49.4207		 =	49.7117					 =	42.2141		 =	42.6422		 =	42.4739
		SD =	1.33639		SD =	1.37458		SD =	1.53903					SD =	1.90336		SD =	1.84268		SD =	1.56181					SD =	1.26247		SD =	1.21785		SD =	1.05684					SD =	1.3347		SD =	1.6517		SD =	1.13898
					 =	30.8247											 =	33.4316											 =	49.517											 =	42.4468
					SD =	1.39538											SD =	1.77539											SD =	1.17374											SD =	1.38248

[truncated: 3 more sheets: Leaves number, Floral buds, Flowers number]
